# Supplementary material
Source: PubMed Central journal article supplement (PMC1808016)
Supplement: pcbi.0030023.sd001.pdf [file pcbi.0030023.sd001.pdf]

# Protocol S1: Mechanochemical coupling in the myosin motor domain.

## II. Analysis of critical residues

### A Important interactions

Table A.1  
Hydrogen bond between the Switch II and Relay helix<sup>a</sup>

| Hydrogen bond        | 1FMW <sup>b</sup> | 1VOM <sup>b</sup> | TMD 1 | TMD 2 | TMD 3 |
|----------------------|-------------------|-------------------|-------|-------|-------|
| HE22(Q468)-OE1(E459) | 11/75             | 44/99             | 19    | 5     | 21    |
| OD1(N472)-HN(E459)   | 90/66             | 99/86             | 87    | 32    | 80    |
| HD21(N472)-O(E459)   | 20/85             | 1/88              | 20    | 29    | 31    |
| HD21(N475)-O(S456)   | 7/93              | 99/99             | 38    | 62    | 16    |
| OD1(N475)-HN(F458)   | 0/0               | 30/19             | 0     | 0     | 1     |

a. The occurrences (in %) of the hydrogen bonds between the Switch II and relay helix. The hydrogen bonds are determined based on a geometric criterion: the hydrogen-acceptor distance is shorter than 2.5 Å and the donor-hydrogen-acceptor angle is larger than 135 °. b. The two numbers refer to the occupancies from the implicit solvent (GBSW) and explicit solvent simulations, respectively. The GBSW model is used for all TMD simulations.

Table A.2

Hydrophobic interactions between the Switch II and Relay helix<sup>a</sup>

| Hydrophobic contact | 1FMW <sup>b</sup> | 1VOM <sup>b</sup> | TMD 1 | TMD 2 | TMD 3 |
|---------------------|-------------------|-------------------|-------|-------|-------|
| I455-T474           | 87/45             | 26/39             | 49    | 56    | 25    |
| I455-L478           | 46/87             | 69/55             | 73    | 50    | 45    |
| S456-I471           | 27/31             | 92/88             | 44    | 62    | 30    |

a. The occurrences (in %) of the hydrophobic contacts between the Switch II and relay helix. The hydrophobic contacts are determined based on a geometric criterion: the non-hydrogen sidechain atoms between two hydrophobic residues are shorter than 4.0 Å. The occurrence refers to the largest probabilities among all the atomic pairs for the two residues. b. The two numbers refer to the occupancies from the implicit solvent (GBSW) and explicit solvent simulations, respectively. The GBSW model is used for all TMD simulations.

Table A.3

Hydrogen bond between the relay helix and SH1 helix and converter domain<sup>a</sup>

| Hydrogen bond        | 1FMW | 1VOM | TMD 1 | TMD 2 | TMD 3 |
|----------------------|------|------|-------|-------|-------|
| HE21(Q479)-O(C678)   |      |      | 11    | 15    |       |
| HE21(Q479)-O(N679)   | 49   |      |       |       | 41    |
| HE22(Q479)-O(N679)   |      | 55   |       |       |       |
| HD21(N483)-OE1(E683) |      |      |       | 28    |       |
| HD21(N483)-OE2(E683) |      |      | 11    |       | 25    |
| OE1(E490)-HH12(R695) | 41   |      | 96    | 78    | 61    |
| OE1(E490)-HH21(R695) |      |      |       | 11    |       |
| OE1(E490)-HH22(R695) | 82   |      | 24    | 30    | 20    |
| OE2(E490)-HH12(R695) | 55   |      | 12    | 16    | 43    |
| OE2(E490)-HH22(R695) | 22   |      | 85    | 75    | 67    |
| OE1(E493)-HE(R695)   |      | 89   |       |       |       |
| OE1(E493)-HH21(R695) |      | 51   |       |       |       |
| OE1(E493)-HZ1(K743)  |      |      | 38    | 11    | 36    |
| OE1(E493)-HZ2(K743)  |      |      | 23    | 13    | 17    |
| OE1(E493)-HZ3(K743)  |      |      | 22    | 11    | 23    |
| OE2(E493)-HH11(R695) |      |      | 81    | 18    | 75    |
| OE2(E493)-HZ1(K743)  |      | 20   |       | 12    |       |
| OE2(E493)-HZ2(K743)  |      | 31   |       | 21    |       |
| OE2(E493)-HZ3(K743)  |      | 17   |       | 14    |       |
| O(E493)-HH12(R738)   |      |      |       |       | 52    |
| O(E493)-HH22(R738)   |      |      |       |       | 27    |
| OH(Y494)-HN(G691)    |      |      | 14    |       |       |
| OH(Y494)-HN(F692)    | 49   | 98   | 44    | 62    | 52    |
| OH(Y494)-HH21(R695)  | 72   |      | 21    |       |       |
| OE1(E497)-HN(I741)   | 99   |      |       | 96    | 90    |
| OE1(E497)-HN(T742)   | 98   | 31   | 27    | 82    | 77    |
| OE1(E497)-HG1(T742)  |      | 37   | 43    |       | 10    |
| OE1(E497)-HN(K743)   | 98   |      | 12    | 29    | 66    |
| OE1(E497)-HZ2(K743)  |      | 11   |       |       |       |
| OE1(E497)-HZ3(K743)  |      | 14   |       |       |       |
| OE2(E497)-HN(I741)   |      | 87   | 89    |       |       |
| OE2(E497)-HN(T742)   | 21   | 85   | 89    | 39    | 43    |
| OE2(E497)-HG1(T742)  | 53   |      |       | 79    | 58    |
| OE2(E497)-HN(K743)   |      | 98   | 49    |       |       |
| O(N500)-HH11(R738)   |      | 23   |       |       |       |
| O(N500)-HH22(R738)   |      | 28   |       |       |       |
| OG1(T502)-HH12(R747) |      | 83   |       |       |       |
| OG1(T502)-HH22(R747) |      | 31   |       |       |       |
| HG1(T502)-O(K690)    |      |      | 14    |       |       |
| O(F506)-HE(R686)     |      |      |       |       | 16    |
| O(F506)-HH21(R686)   |      |      |       |       | 33    |
| HN(G507)-OE1(E683)   |      | 34   |       |       | 31    |
| HN(G507)-OE2(E683)   |      | 40   |       | 17    | 10    |
| OD2(D509)-HH12(R686) |      |      | 12    |       |       |
| OD2(D509)-HH22(R686) |      |      | 45    |       |       |

a. See Fig.A.1 caption for details.

Table A.4  
Hydrophobic interactions between the relay helix and SH1 helix and converter domain<sup>a</sup>

| Hydrophobic contact | 1FMW | 1VOM | TMD 1 | TMD 2 | TMD 3 |
|---------------------|------|------|-------|-------|-------|
| M486-I687           | 35   | 53   | 42    | 36    | 10    |
| M486-T688           |      |      | 29    |       |       |
| F487-I687           |      | 42   |       |       |       |
| K498-R738           |      |      | 17    |       | 24    |
| K498-I741           |      | 13   |       |       |       |
| I499-R738           | 57   | 48   | 25    | 33    | 10    |
| I499-F692           | 61   |      | 56    | 74    | 20    |
| I499-F745           | 80   |      | 87    | 48    | 14    |
| W501-I687           | 15   | 12   |       | 13    |       |
| W501-K690           |      | 38   |       | 65    |       |
| T502-F692           |      |      |       |       | 58    |
| T502-R747           | 22   |      |       |       | 10    |
| F503-F687           |      |      |       |       | 18    |
| F503-K690           | 19   |      | 56    | 47    | 74    |
| I504-K690           |      | 25   |       |       |       |
| F506-R686           |      | 40   | 41    |       |       |
| F506-I687           | 29   | 49   | 43    | 10    | 21    |
| F506-K690           | 12   |      |       | 20    |       |

a. See Fig.A.2 caption for details.

## B List of Bending/Hinge Residues

Table B.1

Results of dynamical domain partition and bending residues of IFMW for the normal modes with involvement coefficient ( $I_k$ ) larger than 0.10 obtained by DynDom(84; 85)<sup>a</sup>

| Mode <sup>b</sup> | $I_k^c$ | No. $d$ | Range of domains $e$                                                                                                                                                      | Bending residues $f$                                                                                                                                                                                                                                                                                                                                                                                                                                                                                                                                                                                                                                                                                                                                                                                                                                                                                                                                                                                                                                                                                                       |
|-------------------|---------|---------|---------------------------------------------------------------------------------------------------------------------------------------------------------------------------|----------------------------------------------------------------------------------------------------------------------------------------------------------------------------------------------------------------------------------------------------------------------------------------------------------------------------------------------------------------------------------------------------------------------------------------------------------------------------------------------------------------------------------------------------------------------------------------------------------------------------------------------------------------------------------------------------------------------------------------------------------------------------------------------------------------------------------------------------------------------------------------------------------------------------------------------------------------------------------------------------------------------------------------------------------------------------------------------------------------------------|
| 8                 | 0.34    | 4       | 1: 3-21,37-48,79-146,151-154,481-506,638-645,653-657,661-691<br>2: 22-27,693-745<br>3: 31-36,49-78<br>4: 147-150,155-480,507-637,646-652,658-660                          | 1-2: 20, <i>21-22</i> ,23-26, <i>690-693</i><br>1-3: 36-37, <i>48-49</i> ,78-79; 2-3: <i>22-25</i> ,26, <i>27</i> ,28-34<br>1-4: 146-147,150-152, <i>154-155</i> ,480-481,504-507,637, <i>638,652-653</i> ,657-658,660-661<br>2-1: <i>80-81</i> ,82-86, <i>95-96</i> ,98, <i>99-101</i><br>2-3: 16-23, <i>48,83-86</i> ,487-494,506-507, <i>684-685</i> ,686-688; 1-3: 28-33<br>2-4: 214-215, <i>241</i> ,242,256-257,440-441, <i>454-455</i> , <i>477</i> ,478, <i>509-514</i> ,643-644<br>3-2: 35,36-46,48, <i>49-50</i> ,76-79, <i>80-81</i> ,82-86; 1-2: 27, <i>28-30</i> ,31-32<br>3-1: 20, <i>21-22</i> ,489-501, <i>687-688</i><br>3-4: 457-458,472-476,506-511<br>3-5: <i>183-184</i> ,193,194,201-202,448-449,639-640, <i>660</i> ,661-663; 4-5: 466-474,581-590<br>1-2: <i>27-28</i> , <i>44-45</i> , <i>47</i> ,48,79, <i>80-82</i> ,95-99, <i>100</i><br>1-3: 456-457, <i>478-479</i> , <i>507</i> ,508,590-591,625-628,634-635<br>1-2: 16-27,29-34,480-481,507-508,645-649, <i>680-681</i><br>1-2: 17-34,38-39,48-49, 79, 80-87,90-96, <i>99-100</i> ,677-678<br>1-3: <i>185-186</i> ,637-652, <i>653-654</i> |
| 9                 | 0.22    | 4       | 1: 30-80,96-98<br>2: 3-21,81-95,101-214,242-256,441-454,478-486,507-509,512-513,644-687<br>3: 22-29,487-506,688-745<br>4: 215-241,257-440,455-477,510-511,514-643         |                                                                                                                                                                                                                                                                                                                                                                                                                                                                                                                                                                                                                                                                                                                                                                                                                                                                                                                                                                                                                                                                                                                            |
| 12                | 0.27    | 5       | 1: 22-27,490-492,688-745<br>2: 32-35,37-37,50-79<br>3: 3-21,36,44-49,80-183,194-201,449-457,476-489,493-506,509-510,640-660,663-687<br>4: 458-467,472-474,507-508,511-581 |                                                                                                                                                                                                                                                                                                                                                                                                                                                                                                                                                                                                                                                                                                                                                                                                                                                                                                                                                                                                                                                                                                                            |
| 14                | 0.17    | 3       | 5: 184-193,202-385,417-448,468-469,590-639,661-662<br>1: 3-27,45-47,82-95,100-456,479-507,591-627,635-745<br>2: 28-44,48-79,97-99<br>3: 457-478,508-590,628-634           |                                                                                                                                                                                                                                                                                                                                                                                                                                                                                                                                                                                                                                                                                                                                                                                                                                                                                                                                                                                                                                                                                                                            |
| 16                | 0.17    | 2       | 1: 9-16,30-480,508-645,648-680<br>2: 27-29,481-507,646-647,681-745                                                                                                        |                                                                                                                                                                                                                                                                                                                                                                                                                                                                                                                                                                                                                                                                                                                                                                                                                                                                                                                                                                                                                                                                                                                            |
| 17                | 0.28    | 3       | 1: 3-18,39-48,87-90,100-131,143,154,156-157,176-185,654-677<br>2: 28-38,49-80,96-99,497-507,678-745<br>3: 186-192,215-241,257-258,260-441,454-496,508-637                 |                                                                                                                                                                                                                                                                                                                                                                                                                                                                                                                                                                                                                                                                                                                                                                                                                                                                                                                                                                                                                                                                                                                            |

a. The involvement coefficients are calculated based on the structure of IFMW and 1VOM. b. the mode number (including the first 6 overall translation/rotation normal modes); c. the involvement coefficient for the normal mode; d. the number of dynamical domains obtained by using the two structures generated following a specific mode with phase angle 90° and 270° at 1500 K; e. the residue range for each domain; f. the bending residue range, and the first index for the domain refers to the fixed one for structural alignment. Italics indicates that the bending region is a mechanical hinge, *i.e.* contains a residue with its C $\alpha$  within 5.5 Å of the interdomain screw axis.

Table B.2

Results of dynamical domain partition and bending residues of IVOM for the normal modes with involvement coefficient ( $I_k$ ) larger than 0.10 obtained by DynDom(84; 85)<sup>b</sup>

| Mode <sup>b</sup> | $I_k^c$ | No. <sup>d</sup> | Range of domains <sup>e</sup>                                                                                                                                                                                                        | Bending residues <sup>f</sup>                                                                                                                                                                                             |
|-------------------|---------|------------------|--------------------------------------------------------------------------------------------------------------------------------------------------------------------------------------------------------------------------------------|---------------------------------------------------------------------------------------------------------------------------------------------------------------------------------------------------------------------------|
| 7                 | 0.18    | 2                | 1: 697-703,705-735<br>2: 3-696,704-704,736-745                                                                                                                                                                                       | 1-2: 681-687,688-693,694-697,700-706,735-745                                                                                                                                                                              |
| 10                | 0.42    | 5                | 1: 3-29<br>2: 30-107,110-113,115-116,673-673,675-688<br>3: 108-109,114,117-305,307,312-347,424-588,616-672,674-674,689-702,726-745<br>4: 306-306,308-311,348-423,592-615<br>5: 703-725                                               | 3-2: 107-117,672-674,675,688-689<br>1-2: 29,30                                                                                                                                                                            |
| 11                | 0.40    | 2                | 1: 3-90,94-110,112-112,125-488,504-690<br>2: 91-93,111,113-124,489-503,691-745                                                                                                                                                       | 3-4: 304-312,347-355,423-424,588-592,613-616<br>3-5: 702-703,725-742,743-744                                                                                                                                              |
| 12                | 0.27    | 2                | 1: 3-20,85-745<br>2: 21-84                                                                                                                                                                                                           | 1-2: 90-91,93-94,110-113,124-125,488-489,502-505,684-692                                                                                                                                                                  |
| 19                | 0.16    | 4                | 1: 3-17,110-116,121-128,131-177,180-211,237,239-261,431-458,476-502,639-662,693-697,732-745<br>2: 29-109,117-118,178-179,664-683<br>3: 129-130,212-228,238-238,262-393,409-413,418-420,428-430,459-475,511-593,601-638<br>4: 706-731 | 1-2: 3-18,19-24,25-28,83-87<br>1-2: 15-29,109-110,116-118,119-121,177-180,662,663-664,683-693<br>1-3: 127-131,201-219,228-237,238-239,261,262,430-431,458-459,475-476,502-511,638-639<br>1-4: 697-702,703-705,706,731-735 |

a. The involvement coefficients are calculated based on the structure of IVOM and 1Q5G. See Table B.1 caption for details.

Table B.3

Results of dynamical domain partition and bending residues of 1Q5G for the normal modes with involvement coefficient ( $I_k$ ) larger than 0.10 obtained by DynDom(84; 85)<sup>a</sup>

| Mode <sup>b</sup> | $I_k^c$ | No. | $d$ | Range of domains <sup>e</sup>                                                                                                                                                              | Bending residues <sup>f</sup>                                                                                                                                                                                                                                                                                                                                         |
|-------------------|---------|-----|-----|--------------------------------------------------------------------------------------------------------------------------------------------------------------------------------------------|-----------------------------------------------------------------------------------------------------------------------------------------------------------------------------------------------------------------------------------------------------------------------------------------------------------------------------------------------------------------------|
| 7                 | 0.20    | 3   |     | 1: 3-486,505-688<br>2: 487-504,689-695,736-745<br>3: 696-735                                                                                                                               | 2-1: 484,485-487,502-504,505-507,508-509,683,684-689<br>2-3: 695,696,735-736                                                                                                                                                                                                                                                                                          |
| 8                 | 0.39    | 5   |     | 1: 3-211,242-258,447-453,482-484,507-509,648-688<br>2: 698-731<br>3: 212-234,241-241,259-260,264-442,518-520,586-630,633-635<br>4: 485-506,689-697,732-745                                 | 1-3: 200-201,202-212,241,242,257-260,438-437<br>1-4: 484-485,506,507,688-689<br>2-4: 697-698,699,731,732<br>1-5: 240-242,453-454,481-482,509-510,647-648<br>3-5: 234-235,240-241,259-261,263,264,517-523,585-588,630-633,635-636                                                                                                                                      |
| 9                 | 0.16    | 4   |     | 5: 235-240,261-263,454-481,510-517,521-585,631-632,636-647<br>1: 86-95,99-106,117-118,123,125,163-194,199-490,504-655,677-683<br>2: 3-29,47-49,107-115,119-122,124,126-162,195-198,656-670 | 1-2: 105-107,115-119,122-124,125,126,162,163,194-195,198-199,655,656<br>3-2: 28-30,46-47,49-50,670-671<br>1-3: 80-96,98-99,675-677,678,681-685<br>1-4: 483-492,502-503,504-505,3-4: 691-698<br>4-1: 218,219-221,222,223,243-244,254-257,258,437-438,439,454-455,473-474,516-517,637-638<br>3-1: 93-96,479,480,506-507,688-689<br>4-2: 356-359,376-377,408-411,418-419 |
| 12                | 0.28    | 6   |     | 3: 30-46,50-85,96-98,671-675,684-691,693-694,696<br>4: 492-503,692,695,697<br>1: 3-93,96-218,244-256,439-454,474-479,507-516,638-688                                                       |                                                                                                                                                                                                                                                                                                                                                                       |
| 16                | 0.18    | 2   |     | 2: 359-376,411-418<br>3: 94-95,480-506,689-697,734-745<br>4: 219-243,257-358,377-394,408-410,419-438,455-473,517-592,597-620,627-637<br>5: 395-407,593-596,621-626<br>6: 698-733           | 4-5: 394-395,407-410,588-590,591-593,618,619-621,626-627<br>3-6: 697-699,733-734                                                                                                                                                                                                                                                                                      |
| 17                | 0.19    | 3   |     | 1: 18-40,44,47-78<br>2: 3-17,41-43,45-46,79-745<br>1: 356-420                                                                                                                              | 1-2: 78-79<br>2-1: 352-353,354-356,420-425                                                                                                                                                                                                                                                                                                                            |
| 21                | 0.19    | 2   |     | 2: 3-32,46-48,80-355,425-488,503-688,690-692<br>3: 33-45,49-79<br>1: 221-229,235-237,265-396,407-435,589-621,627-628<br>2: 399-405,459-476,512-513,517-585,623-626                         | 2-3: 32-33,43-44,45-46,48-49,78-80<br>1-2: 396-399,405-407,585-589,621-627                                                                                                                                                                                                                                                                                            |

a. The involvement coefficients are calculated based on the structure of 1Q5G and IFMW. See Table B.1 caption for details.

Table B.4

Results of dynamical domain partition and bending residues of IVOM for the normal modes with involvement coefficient ( $I_k$ ) larger than 0.10 obtained by DynDom(84; 85)<sup>a</sup>

| Mode <sup>b</sup> | $I_k^c$ | No. $d$ | Range of domains $e$                   | Bending residues $f$                                       |
|-------------------|---------|---------|----------------------------------------|------------------------------------------------------------|
| 7                 | 0.68    | 3       | 1: 697-724                             | 3-1: 695-697, 724, 725-727                                 |
|                   |         |         | 2: 3-487,503-688                       | 3-2: 484-485, 486-487, 488, 502-503, 687, 688-689          |
|                   |         |         | 3: 488-502,689-696,725-745             |                                                            |
| 8                 | 0.22    | 3       | 1: 724-743                             |                                                            |
|                   |         |         | 2: 3-696,744-745                       | 1-2: 743-745                                               |
|                   |         |         | 3: 697-723                             | 1-3: 723-724; 2-3: 695-697                                 |
| 11                | 0.12    | 2       | 1: 3-93,95-108,116-124,138-157,671-684 |                                                            |
|                   |         |         | 2: 94,109-115,125-137,158-670,685-745  | 1-2: 93-95,108-109,115-116,124-125,137-138,157-158,670-671 |
| 12                | 0.12    | 3       | 1: 3-486,511-687                       | 3-1: 486-487,510-511,685-688                               |
|                   |         |         | 2: 706-726                             | 3-2: 704,705,706,726,727                                   |
|                   |         |         | 3: 487-510,688-705,727-745             |                                                            |

a. The involvement coefficients are calculated based on the structure of IVOM and IFMW. See Table B.1 caption for details.



Table B.5  
 Results of dynamical domain partition and bending residues of the crystal structures obtained by DynDom(84; 85)<sup>a</sup>

| Structural pairs | No. <sup>d</sup> | Range of domains <sup>e</sup>                                                  | Bending residues <sup>f</sup>                                        |
|------------------|------------------|--------------------------------------------------------------------------------|----------------------------------------------------------------------|
| IFMW vs. 1VOM    | 2                | 1: 3-485,502-689<br>2: 486-501,690-745                                         | 1-2: 485,486,501-505,506-509,689-690                                 |
| 1VOM vs. 1Q5G    | 2                | 1: 487-505,689-745<br>2: 3-486,506-688                                         | 1-2: 486-487,505-510,681-683,684,685-686,687,688-689                 |
| 1Q5G vs. 1FMW    | 2                | 1: 3-203,245-256,443-452,484-507,646-745<br>2: 204-244,257-442,453-483,508-645 | 1-2: 201-210,244-245,256-257,441-444,452-453,483-484,499-509,645,646 |

a. See Table B.1 caption for details.

Table B.6  
Partition of hinge residues based on relations to SCA results and conservation<sup>a</sup>

| Structural motif        | Hinges                                          | Appear in SCA           | highly conserved ( $\geq 80\%$ ) | The rest <sup>b</sup>                       |
|-------------------------|-------------------------------------------------|-------------------------|----------------------------------|---------------------------------------------|
| $\beta$ -sheet: 115-127 | 19-25,27-30,35,44-50,78-87,95-96,99-101,109-110 | 81,82,95,110            | 99,109                           | 19-25,27-30,35,44-50,78-80,83-87,96,100-101 |
|                         | 116-118,124-125                                 |                         | 116,117,118                      | 124-125                                     |
|                         | 154-155,162                                     |                         | 154,162                          | 155                                         |
| $\beta$ -sheet: 171-178 |                                                 |                         |                                  |                                             |
| P-loop: 179-186         | 183-186                                         |                         | 183,184,185,186                  |                                             |
|                         | 193                                             | 193                     |                                  |                                             |
| Loop 1: 199-218         | 200-201,218                                     |                         |                                  | 200-201,218                                 |
|                         | 222                                             |                         | 222                              |                                             |
| Switch I: 233-238       | 238                                             |                         | 238                              |                                             |
|                         | 239                                             |                         | 239                              |                                             |
| $\beta$ -sheet: 240-262 | 241,258,262                                     |                         | 241,262                          | 258                                         |
|                         | 264,352-353,376-377,407-410,418-425,437-438     | 352,409,418,419         | 264,423,438                      | 353,376-377,407-408,410,420-422,424-425,437 |
| Switch II: 454-459      | 454-455                                         |                         | 454,455                          |                                             |
| Relay helix: 466-518    | 477-480,483-487,502-503,505-507,509-514         | 484,486,505,510,513,514 | 478,479,509                      | 477,480,483,485,487,502-503,506-507,511-512 |
|                         | 585-589                                         |                         | 587,588                          | 585-586,589                                 |
| Strut: 590-593          | 591-593                                         | 591,593                 |                                  | 592                                         |
| Loop 2: 610-628         | 619-621,626-627                                 | 627                     |                                  | 619-621,626                                 |
|                         | 638                                             |                         | 638                              |                                             |
| $\beta$ -sheet: 648-657 | 652-655                                         | 652                     | 654,655                          | 653                                         |
|                         | 660,663-664                                     |                         |                                  | 660,663-664                                 |
| SH1 helix: 669-690      | 670-671,675-677,680-690                         | 688                     | 675,676,680,683,686              | 670-671,677,681-682,684-685,687,689-690     |
|                         | 691-702,705,706                                 | 692                     | 691,695,701                      | 693-694,696-700,702,705,706                 |
| Converter: 710-747      | 723-724,727,732-736,743-745                     |                         | 743,745                          | 723-724,727,732-736                         |

a. The hinges include all the hinges in Table 2 (excluding those based on X-ray structures. The criterion for the highly conservation is set to 0.80. b. For the conservation of these residues, refer to Fig.B.1.

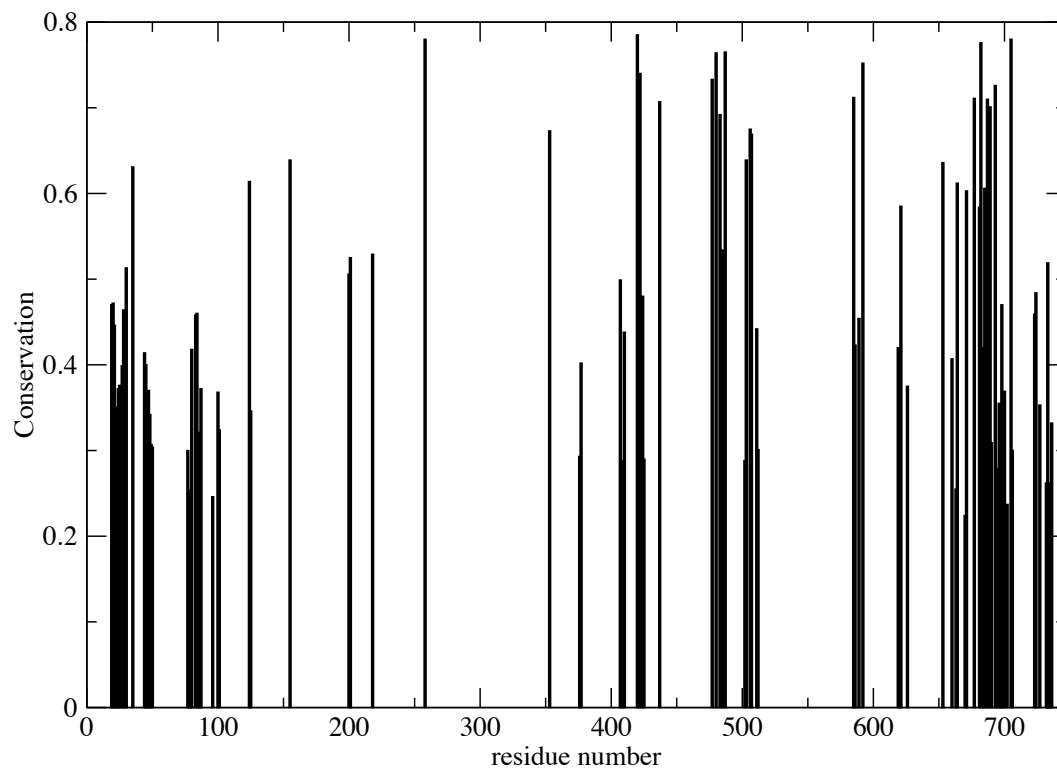

Fig. B.1: The degree of conservation for hinge residues that are neither overlapped with SCA core residues nor highly conserved ( $<80\%$ ); i.e., the last column in Table B.6.

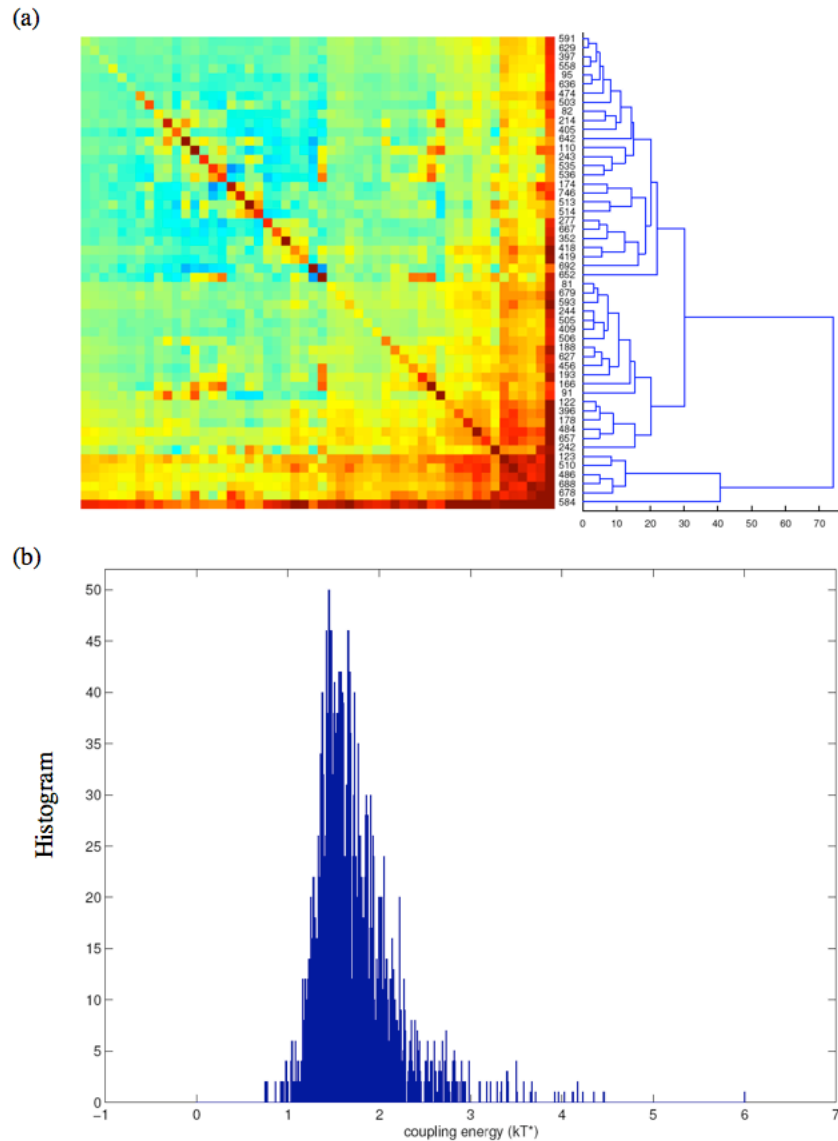

Fig.B.2: Results from the statistical coupling analysis associated with the 52 strongly coupled core residues. (a) The submatrix of pairwise coupling energies after hierarchical clustering, plotted with blue representing the lowest coupling energy ( $0 kT^*$ ) and red representing the highest coupling energy ( $3 kT^*$ ), respectively.  $kT^*$  is an arbitrary energy unit. Both columns and rows represent the residue number of *Dictyostelium* myosin motor domain. (b) The histogram of pairwise coupling energies, which shows a mean value of  $1.72kT^*$ , implying that these core residues are coupled to each other significantly.
